# Supplementary material for: Regime shift detection and neurocomputational substrates for under and overreactions to change
Source: eLife. 2026 May 11;14:RP104684. doi: 10.7554/eLife.104684 (PMC13160555; doi:10.7554/eLife.104684)
Supplement: Supplementary file 10. [file elife-104684-supp10.docx]

| **Model** | **Likelihood** | **Number of Parameters** | **AIC** |
| --- | --- | --- | --- |
| SN-original |  |  |  |
| SN-SigDep- |  |  |  |
| SN-SigDep- |  |  |  |
| SN-SigDep- |  |  |  |
