# Supplementary material for: Regime shift detection and neurocomputational substrates for under and overreactions to change
Source: eLife. 2026 May 11;14:RP104684. doi: 10.7554/eLife.104684 (PMC13160555; doi:10.7554/eLife.104684)
Supplement: Supplementary file 11. [file elife-104684-supp11.docx]

| **Model** | **test** | **-value** | **Bonferroni-corrected -value** |
| --- | --- | --- | --- |
| SN-SigDep- SN-original |  |  |  |
| SN-SigDep- SN-original |  |  |  |
| SN-SigDep- SN-original |  |  |  |
| SN-SigDep- SN-SigDep- |  |  |  |
| SN-SigDep- SN-SigDep- |  |  |  |
| SN-SigDep- SN-SigDep- |  |  |  |
